# Supplementary material
Source: publisher figshare collection journal article supplement (https://acs.figshare.com/ndownloader/files/4377433)
Supplement: Supplementary file 1 [file 4377433]

Supporting Information for

# Unique Ultrafast Visible Luminescence in Monolayer-Protected Au<sub>25</sub> Clusters

*<sup>a</sup>Mary Sajini Devadas, <sup>a</sup>Junhyung Kim, <sup>a</sup>Ekkehard Sinn, <sup>b</sup>Dongil Lee, <sup>c</sup>Theodore Goodson III and  
<sup>a</sup>Guda Ramakrishna\**

<sup>a</sup>Department of Chemistry, Western Michigan University, Kalamazoo, MI 49008

<sup>b</sup>Department of Chemistry, Yonsei University, Seoul 120-749, Korea

<sup>c</sup>Department of Chemistry, University of Michigan, Ann Arbor MI 48109

E-mail: rama.guda@wmich.edu

## 1. Transmission Electron Microscopy (TEM) measurements

TEM images of MPC samples were obtained with a JEOL transmission electron microscope (JEM-1230). MPC samples were prepared by dipping a Formvar/carbon-coated copper grid (400C-FC, EMS) in 1 mg/mL MPC in CH<sub>2</sub>Cl<sub>2</sub> for the hexanethiolate MPC and water in the case of the glutathione MPC and citrate nanoparticle. Three typical regions of each sample were imaged at 600 K magnification and 200 K magnification for the Au-Citrate sample. Core-size histograms were read from digitized photographic images using ImageJ software [<http://rsb.info.nih.gov/ij/>].

Values were confirmed by manual reading. Shown in Figure S1 are the TEM images of  $\text{Au}_{25}(\text{C}_6\text{S})_{18}$ ,  $\text{Au}_{25}(\text{GS})_{18}$ , 2.2 nm-Au(GS), and 13 nm-Au(Cit) and the insert shows the histogram of sizes.

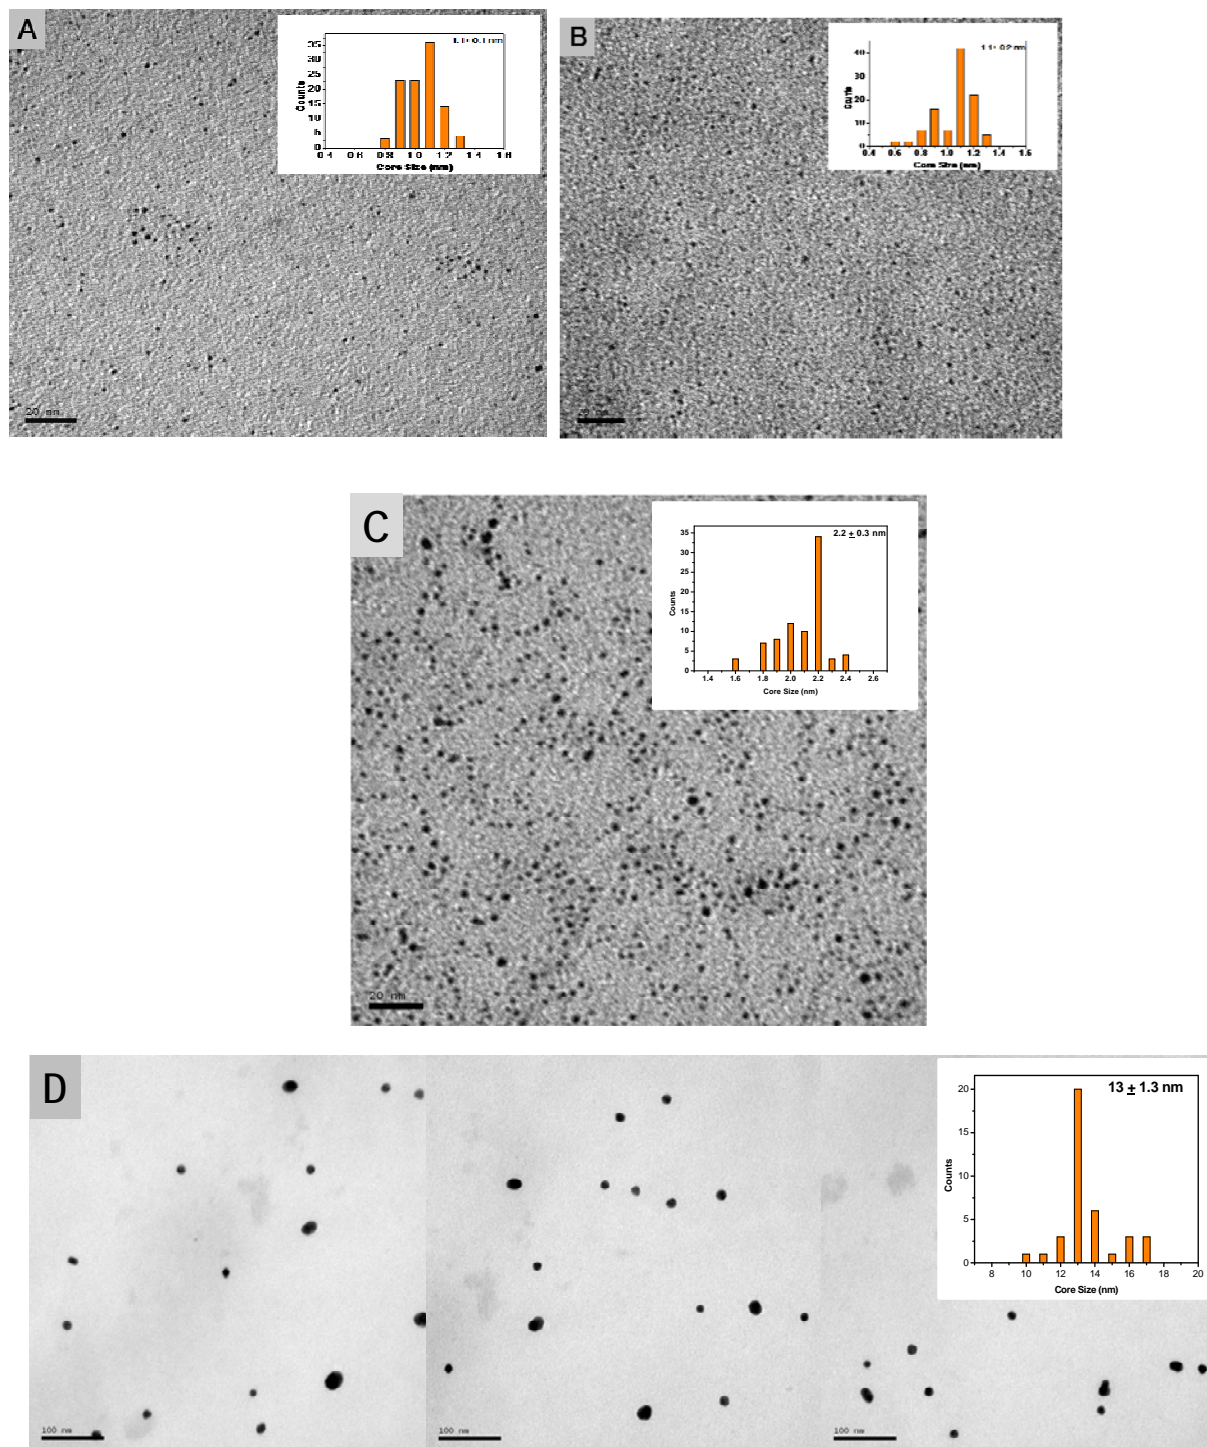

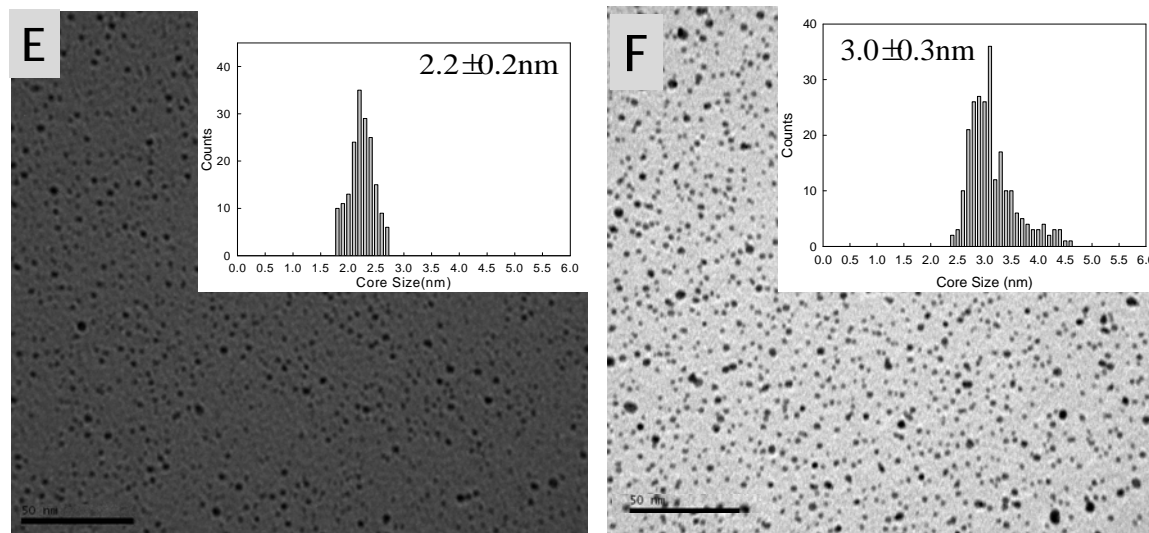

**Figure S1:** TEM image of the synthesized (A) Au<sub>25</sub>(C<sub>6</sub>S)<sub>18</sub> clusters (B) Au<sub>25</sub>(GS)<sub>18</sub> (C) 2.2 nm-Au(GS), (D) 13 nm-Au(Cit), (E) 2.2 nm-Au(C<sub>6</sub>S) and (F) 3 nm-Au(C<sub>6</sub>S) and the insert shows the histogram of sizes. Scale bars are 20 nm for A, B, C, 100 nm for D and 50 nm for E and F respectively.

## 2 Electrochemical measurements

Voltammetry was carried out on an electrochemical workstation (Model 660B, CH instruments) in 0.1 M Bu<sub>4</sub>NClO<sub>4</sub> in CH<sub>2</sub>Cl<sub>2</sub> solutions that were degassed with high-purity Ar gas. The working electrode was a 0.4 mm Pt disk, the counter electrode was a 0.4 mm Pt disk, and the reference electrode was a silver wire quasi-reference electrode. Square wave voltammetry (SWV) was carried out with potential steps of 4 mV, square wave amplitude of 25 mV, square wave frequency of 15 s<sup>-1</sup>, and a quiet time of 5 s.

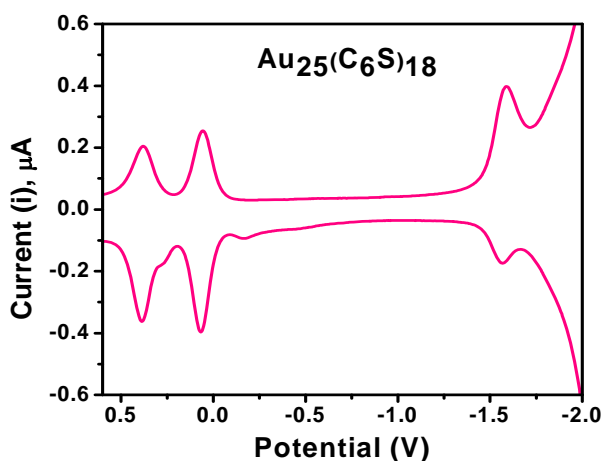

**Figure S2:** Square Wave Voltammogram of  $\text{Au}_{25}(\text{C}_6\text{S})_{18}$  clusters.

### 3. Luminescence decay analyses

Obtained luminescence kinetics of  $\text{Au}_{25}\text{L}_{18}$  clusters are fitted with exponential growth and kinetics given in the equations 1 and 2 of the manuscript and the time constants are provided in Table S1.

**Table S1:** Lifetimes of  $\text{Au}_{25}$  clusters capped with hexanethiol and glutathione at different emission wavelengths after excitation at 400 nm

| Sample/wavelength                                | $\tau_g$ | $\tau_1$       | $\tau_2$       | $\tau_{d, av}$ (fs) |
|--------------------------------------------------|----------|----------------|----------------|---------------------|
| $\text{Au}_{25}(\text{C}_6\text{S})_{18}/500$ nm | 180 fs   | 200 fs (99.8%) | 1.65 ps (0.2%) | 200                 |
| $\text{Au}_{25}(\text{C}_6\text{S})_{18}/520$ nm | 200 fs   | 230 fs (99.8%) | 1.05 ps (0.2%) | 230                 |
| $\text{Au}_{25}(\text{C}_6\text{S})_{18}/550$ nm | 220 fs   | 280 fs (99.4%) | 1.65 ps (0.6%) | 290                 |
| $\text{Au}_{25}(\text{C}_6\text{S})_{18}/580$ nm | 230 fs   | 310 fs (98.6%) | 1.65 ps (1.4%) | 330                 |
| $\text{Au}_{25}(\text{C}_6\text{S})_{18}/610$ nm | 235 fs   | 350 fs (96.1%) | 2.2 ps (3.9%)  | 420                 |
| $\text{Au}_{25}(\text{C}_6\text{S})_{18}/640$ nm | 245 fs   | 420 fs (97.3%) | 1.5 ps (2.7%)  | 450                 |
| $\text{Au}_{25}(\text{C}_6\text{S})_{18}/670$ nm | 300 fs   | 570 fs (93.5%) | 6.8 ps (6.5%)  | 980                 |
| $\text{Au}_{25}(\text{GS})_{18}/480$ nm          | 140 fs   | 185 fs (99.9%) | 1.6 ps (0.1%)  | 185                 |
| $\text{Au}_{25}(\text{GS})_{18}/500$ nm          | 180 fs   | 230 fs (99.5%) | 1.6 ps (0.5%)  | 240                 |

|                                             |        |                |                                  |      |
|---------------------------------------------|--------|----------------|----------------------------------|------|
| Au <sub>25</sub> (GS) <sub>18</sub> /520 nm | 210 fs | 270 fs (99.3%) | 1.6 ps (0.7%)                    | 280  |
| Au <sub>25</sub> (GS) <sub>18</sub> /550 nm | 220 fs | 290 fs (97.6%) | 1.65 ps (2.4%)                   | 320  |
| Au <sub>25</sub> (GS) <sub>18</sub> /580 nm | 220 fs | 340 fs (95.9%) | 2.8 ps (4.1%)                    | 440  |
| Au <sub>25</sub> (GS) <sub>18</sub> /610 nm | 235 fs | 330 fs (90.1%) | 2.1 ps (9.9%)                    | 505  |
| Au <sub>25</sub> (GS) <sub>18</sub> /640 nm | 250 fs | 410 fs (84.2%) | 4.8 ps (15.8%)                   | 1100 |
| Au <sub>25</sub> (GS) <sub>18</sub> /670 nm | 300 fs | 525 fs (68.7%) | 3.6 ps (26.9%),<br>>10 ps (4.4%) | 1400 |

Luminescence traces obtained for gold clusters, Au<sub>25</sub>(C<sub>6</sub>S)<sub>18</sub> in DCM and Au<sub>25</sub>(GS)<sub>18</sub> in water at different luminescence wavelengths are shown in parts A, B, C, D, E and F of Figure S3. It can be observed that the growth of the emission is independent of the ligand while the decay of fluorescence is varied with passivating ligand. Slower decay is observed for the GS capping ligand over C<sub>6</sub>S.

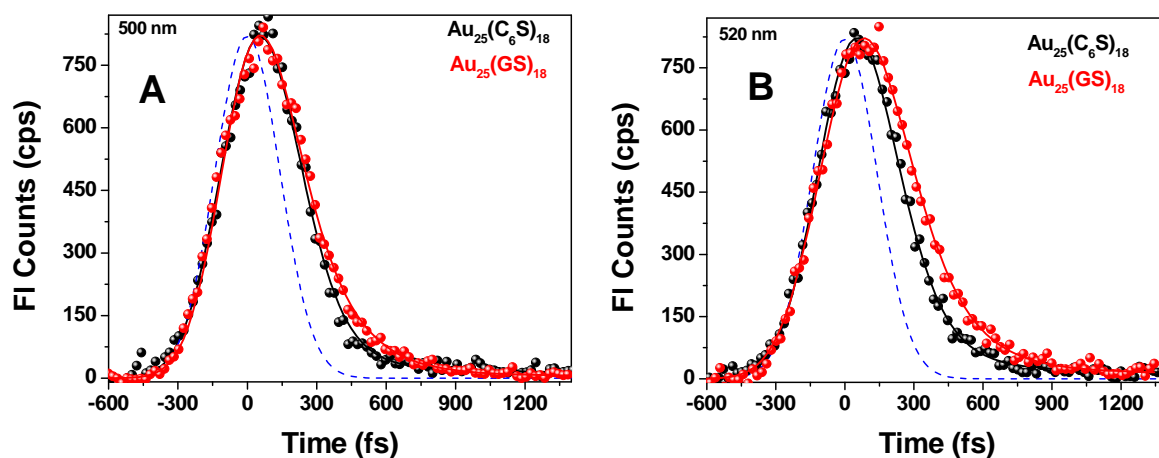

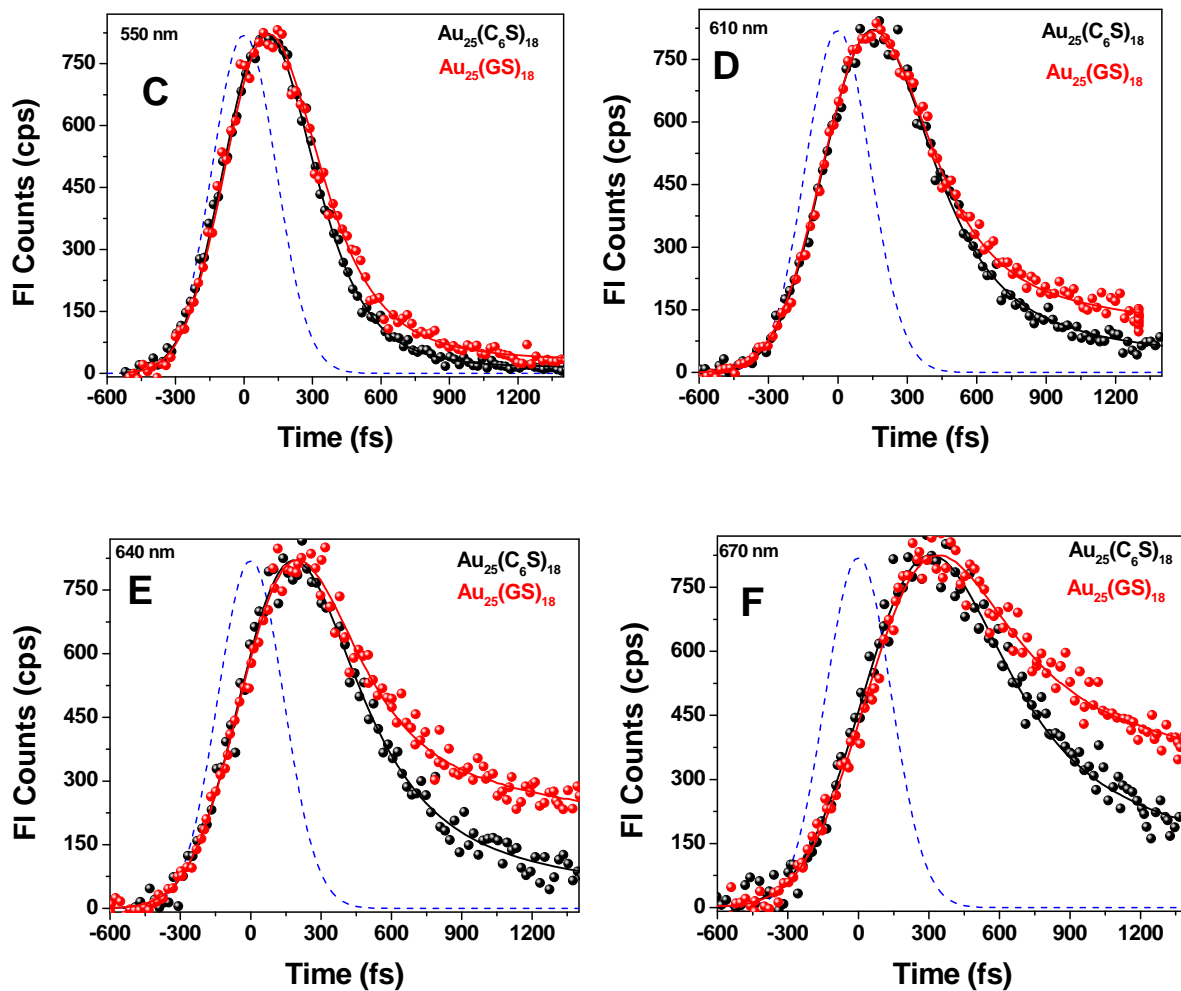

**Figure S3:** Comparative luminescence decay traces for  $\text{Au}_{25}(\text{C}_6\text{S})_{18}$  in DCM and  $\text{Au}_{25}(\text{GS})_{18}$  in water at the monitoring wavelengths of (A) 500 nm, (B) 520 nm, (C) 550 nm, (D) 610 nm, (E) 640 nm and (F) 670 nm after excitation at 400 nm.
